# Supplementary material for: Predictive Value of Post-Percutaneous Coronary Intervention Quantitative Flow Ratio for Vessel-Oriented Composite Endpoint
Source: J Interv Cardiol. 2023 Sep 9;2023:2438347. doi: 10.1155/2023/2438347 (PMC10505082; doi:10.1155/2023/2438347)
Supplement: Supplementary Materials — Table 4: occurrences of CV death, TVMI, and TVR 312. Figure 5: Forest plot (CV death, TVMI, and TVR). [file 2438347.f1.zip]

Archive with 2 entries (2 files):
- Figure 5  Forest plot(CV death, TVMI and TVR).pdf
- Table 4  Occurrences of CV death, TVMI and TVR (1).docx
