# Supplementary figures and images for: Predictive Value of Post-Percutaneous Coronary Intervention Quantitative Flow Ratio for Vessel-Oriented Composite Endpoint
Source: Hindawi journal article supplement (doi:10.1155/2023/2438347), 2023-09-09

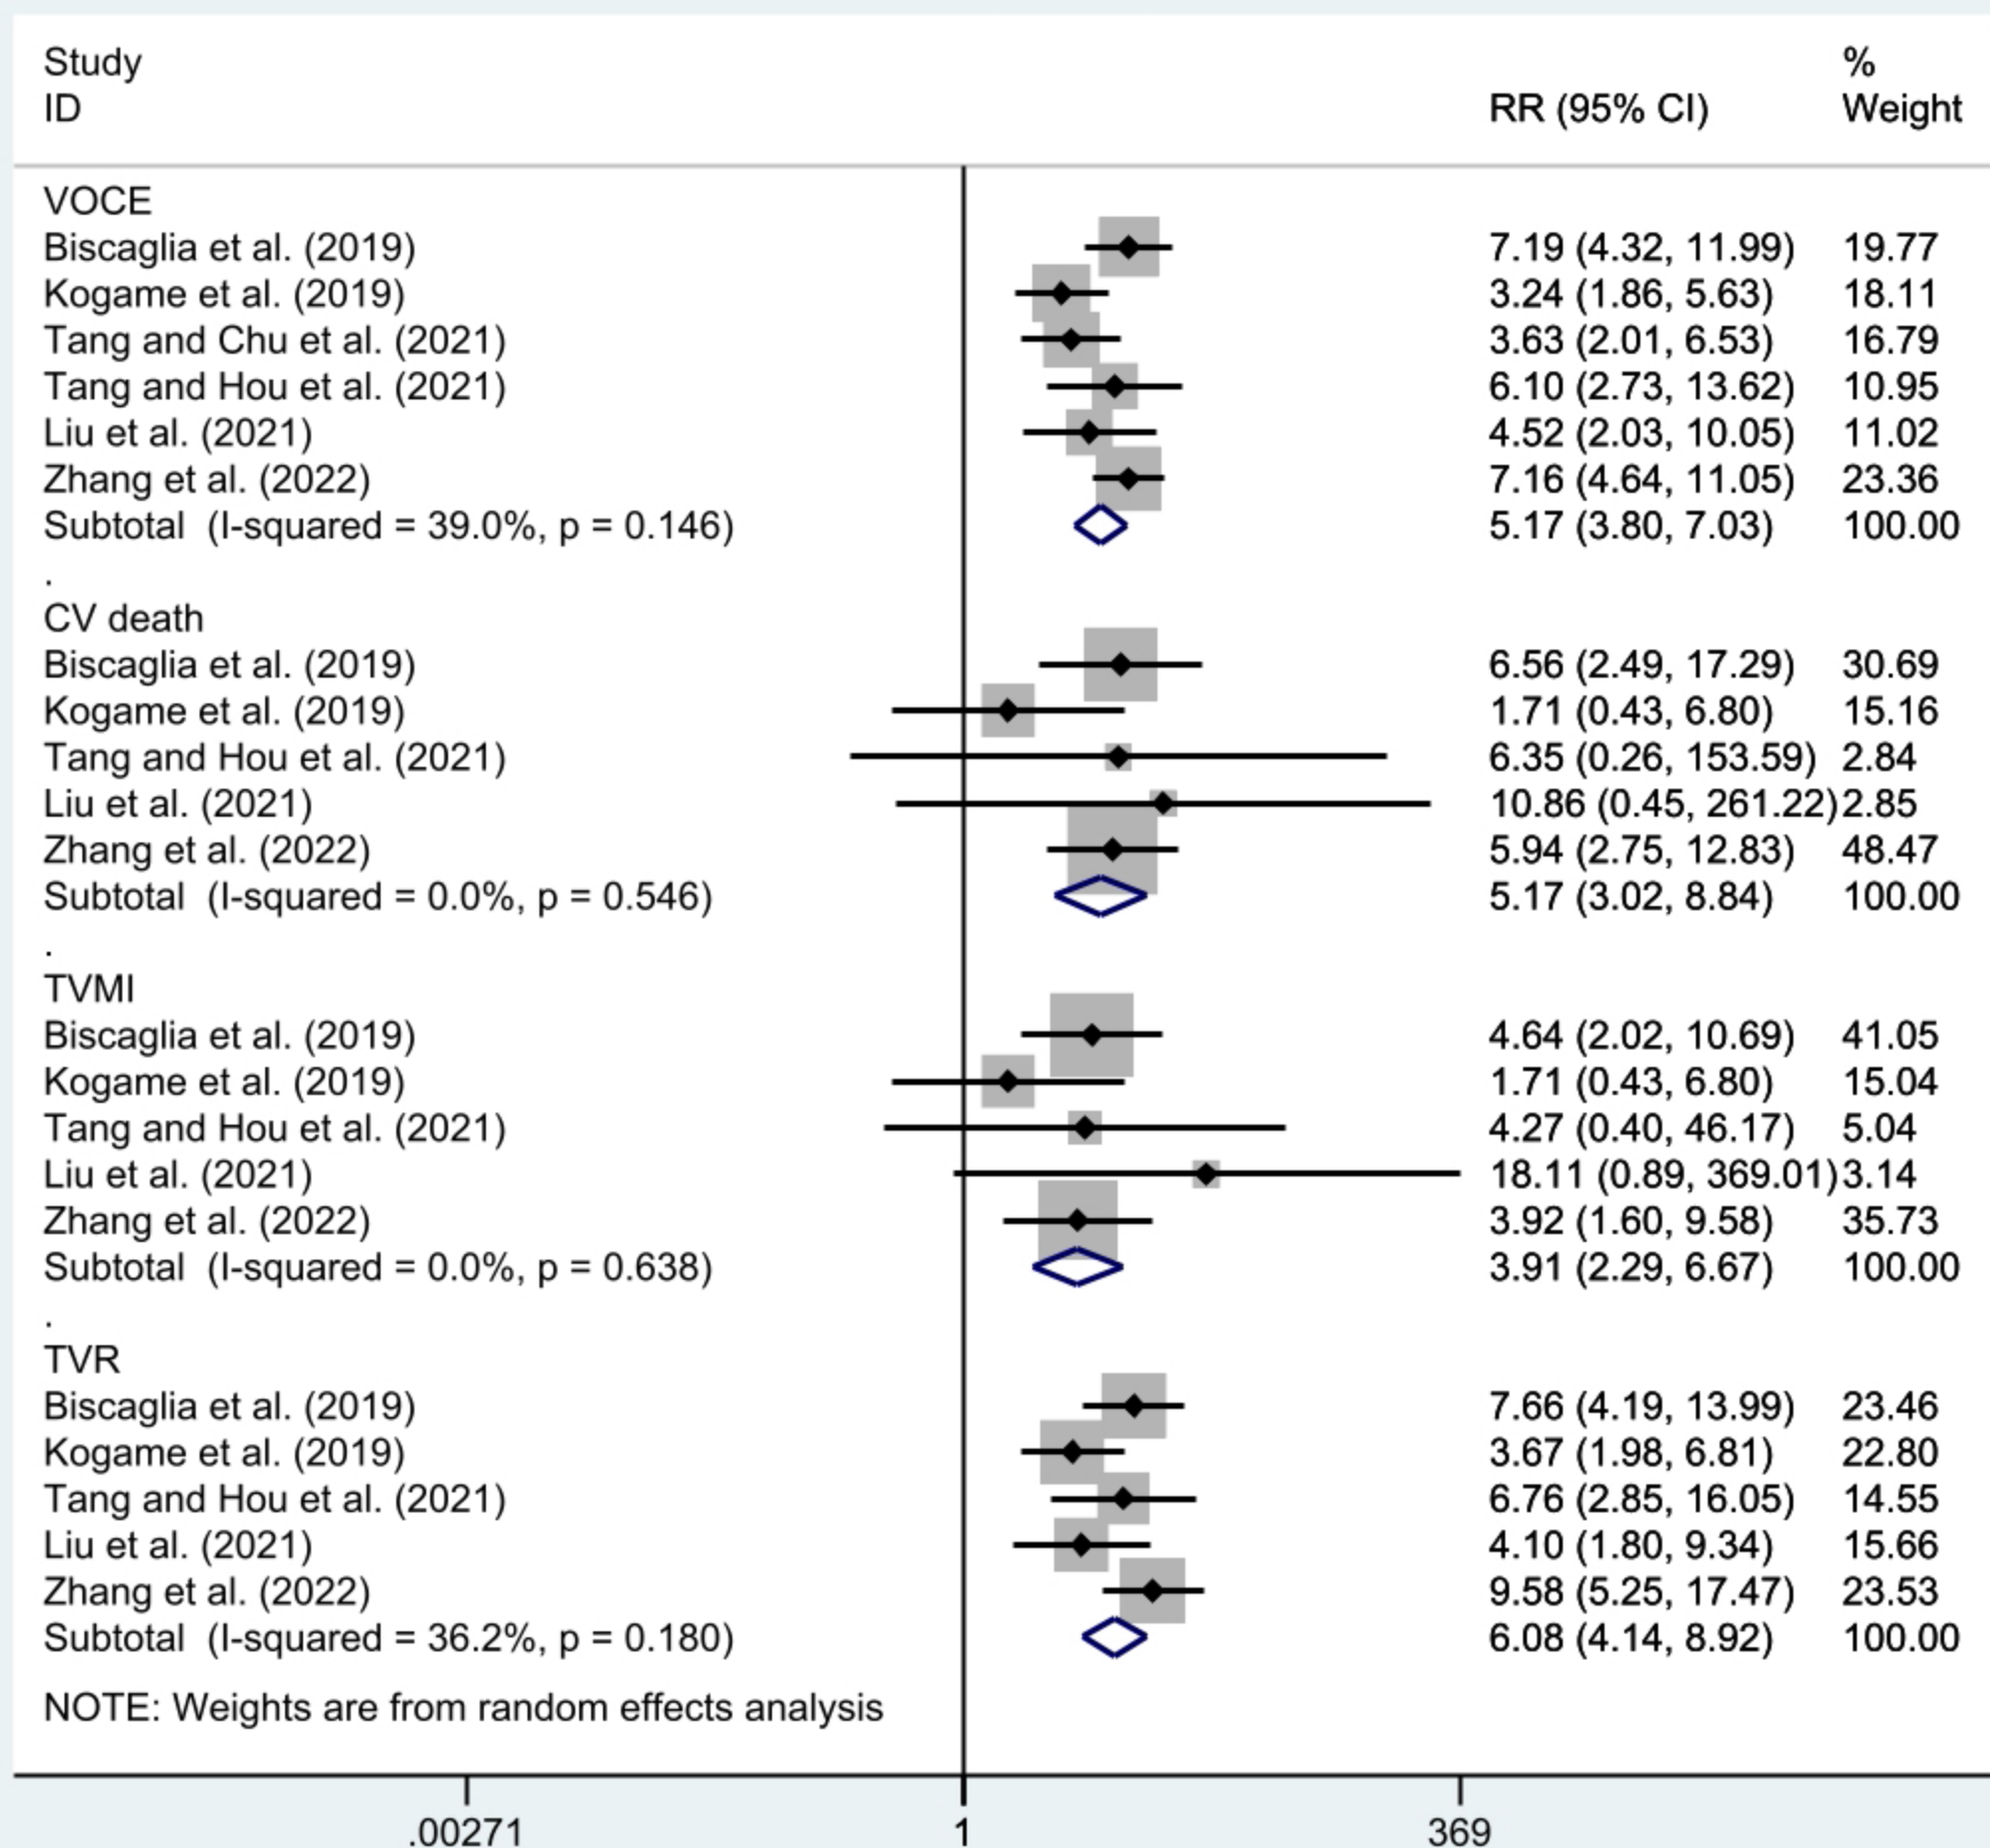

Supplement: f1 [file 2438347.f1.zip]
